# Supplementary material
Source: HighWire-hosted journal article supplement (https://cmajopen.ca/highwire/filestream/88495/field_highwire_adjunct_files/1/open-2021-0151-original-submission.pdf)
Supplement: open-2021-0151-original-submission.pdf [file open-2021-0151-original-submission.pdf]

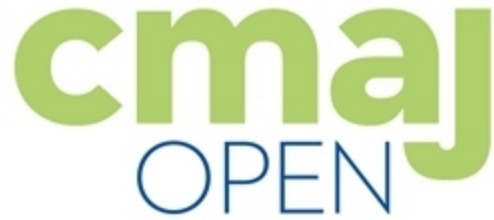

**Clinical characteristics, multi-organ dysfunction, and outcomes of patients with COVID-19: A prospective observational study**

|                               |                                                                                                                                                                                                                                                                                                                                                                                                                                                                                                                                                                                                                                                                                                                                                                                                                                                                                                                                                                                                                                                                                                                                                                                                                                                                                                                                                                                                         |
|-------------------------------|---------------------------------------------------------------------------------------------------------------------------------------------------------------------------------------------------------------------------------------------------------------------------------------------------------------------------------------------------------------------------------------------------------------------------------------------------------------------------------------------------------------------------------------------------------------------------------------------------------------------------------------------------------------------------------------------------------------------------------------------------------------------------------------------------------------------------------------------------------------------------------------------------------------------------------------------------------------------------------------------------------------------------------------------------------------------------------------------------------------------------------------------------------------------------------------------------------------------------------------------------------------------------------------------------------------------------------------------------------------------------------------------------------|
| Journal:                      | <i>CMAJ Open</i>                                                                                                                                                                                                                                                                                                                                                                                                                                                                                                                                                                                                                                                                                                                                                                                                                                                                                                                                                                                                                                                                                                                                                                                                                                                                                                                                                                                        |
| Manuscript ID                 | CMAJOpen-2021-0151                                                                                                                                                                                                                                                                                                                                                                                                                                                                                                                                                                                                                                                                                                                                                                                                                                                                                                                                                                                                                                                                                                                                                                                                                                                                                                                                                                                      |
| Manuscript Type:              | Cohort (prospective)                                                                                                                                                                                                                                                                                                                                                                                                                                                                                                                                                                                                                                                                                                                                                                                                                                                                                                                                                                                                                                                                                                                                                                                                                                                                                                                                                                                    |
| Date Submitted by the Author: | 08-Jun-2021                                                                                                                                                                                                                                                                                                                                                                                                                                                                                                                                                                                                                                                                                                                                                                                                                                                                                                                                                                                                                                                                                                                                                                                                                                                                                                                                                                                             |
| Complete List of Authors:     | Honarmand, Kimia; Western University, Department of Medicine<br>Fiorini, Kyle; Western University, Department of Medicine<br>Chakraborty, Debarati; Western University, Department of Medicine<br>Gillett, Daniel; Western University, Department of Medicine<br>Desai, Karishma ; Western University, Department of Medicine<br>Martin, Claudio; Western University, Department of Medicine<br>Bosma, Karen; Schulich School of Medicine and Dentistry, Department of Medicine, Division of Critical Care Medicine; London Health Sciences Centre, Medical Surgical Intensive Care Unit<br>Slessarev, Marat; Western University, Department of Medicine; Western University, Department of Medical Biophysics<br>Ball, Ian; Western University, Department of Medicine; Western University, Department of Epidemiology and Biostatistics<br>Mele, Tina; Western University, Department of Medicine<br>LeBlanc, Danielle ; Western University, Department of Medicine<br>Elsayed, Sameer; Western University, Department of Microbiology and Infectious Diseases<br>Lazo-Langner, Alejandro; Western University, Department of Medicine; Western University, Department of Epidemiology and Biostatistics<br>Nicholson, Mike ; Western University, Department of Medicine<br>Arntfield, Robert; Western University, Department of Medicine<br>Basmaji, John; Western University, Department of Medicine |
| Keywords:                     | Infectious diseases, Critical care, intensive care                                                                                                                                                                                                                                                                                                                                                                                                                                                                                                                                                                                                                                                                                                                                                                                                                                                                                                                                                                                                                                                                                                                                                                                                                                                                                                                                                      |
| More Detailed Keywords:       | COVID-19, Multi-organ dysfunction, Patient outcomes, Observational study                                                                                                                                                                                                                                                                                                                                                                                                                                                                                                                                                                                                                                                                                                                                                                                                                                                                                                                                                                                                                                                                                                                                                                                                                                                                                                                                |
| Abstract:                     | <b>Background</b><br>Characterizing the multi-organ manifestations and outcomes of patients hospitalized with COVID-19 will inform resource requirements to address the long-term burden of this disease. We sought to characterize the clinical trajectory of organ dysfunction, management of disease sequelae, and short- and long-term outcomes of hospitalized patients with COVID-19.<br><b>Methods</b>                                                                                                                                                                                                                                                                                                                                                                                                                                                                                                                                                                                                                                                                                                                                                                                                                                                                                                                                                                                           |

1  
2  
3  
4  
5  
6  
7  
8  
9  
10  
11  
12  
13  
14  
15  
16  
17  
18  
19  
20  
21  
22  
23  
24  
25  
26  
27  
28  
29  
30  
31  
32  
33  
34  
35  
36  
37  
38  
39  
40  
41  
42  
43  
44  
45  
46  
47  
48  
49  
50  
51  
52  
53  
54  
55  
56  
57  
58  
59  
60

|  |                                                                                                                                                                                                                                                                                                                                                                                                                                                                                                                                                                                                                                                                                                                                                                                                                                                                                                                                                                                                                                                                                                                                                                                                                                                                                                                                                                                                                                                                                                                                                                                                                                            |
|--|--------------------------------------------------------------------------------------------------------------------------------------------------------------------------------------------------------------------------------------------------------------------------------------------------------------------------------------------------------------------------------------------------------------------------------------------------------------------------------------------------------------------------------------------------------------------------------------------------------------------------------------------------------------------------------------------------------------------------------------------------------------------------------------------------------------------------------------------------------------------------------------------------------------------------------------------------------------------------------------------------------------------------------------------------------------------------------------------------------------------------------------------------------------------------------------------------------------------------------------------------------------------------------------------------------------------------------------------------------------------------------------------------------------------------------------------------------------------------------------------------------------------------------------------------------------------------------------------------------------------------------------------|
|  | <p>We conducted a prospective observational study of adult patients with COVID-19 admitted to one of two hospitals in London, Canada during the first wave of the pandemic. We recorded patients' baseline characteristics, physiological parameters, measures of organ function, and therapies administered during hospitalization in non-ICU and ICU patients, and compared the characteristics of hospital survivors to non-survivors. Finally, we recorded follow-up thoracic computerized tomography (CT) and echocardiographic findings after hospital discharge.</p> <p><b>Results</b></p> <p>We enrolled 100 consecutive patients (53 women) hospitalized with COVID-19, including 32 patients who received ICU care and 68 who were treated in non-ICU settings. Respiratory sequelae were common: 23% received high flow oxygen by nasal cannula, 9% received non-invasive ventilation, 24% received invasive mechanical ventilation, and 2% received veno-venous extracorporeal membrane oxygenation. Overall, 9% of patients had cerebrovascular events (4% ischemic stroke, 6% intracranial hemorrhage) and 6% had pulmonary embolism. After discharge, 11 of 19 patients had persistent abnormalities on CT thorax and 6 of 15 had persistent cardiac dysfunction on echocardiography.</p> <p><b>Interpretation</b></p> <p>COVID-19 is a multi-system disease involving neurological, cardiac, and thrombotic dysfunction, without evidence of hepatic dysfunction. Patients have persistent organ dysfunction after hospital discharge, underscoring the need for research on long-term outcomes of COVID-19 survivors.</p> |
|  |                                                                                                                                                                                                                                                                                                                                                                                                                                                                                                                                                                                                                                                                                                                                                                                                                                                                                                                                                                                                                                                                                                                                                                                                                                                                                                                                                                                                                                                                                                                                                                                                                                            |

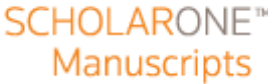

1  
2  
3 **Clinical characteristics, multi-organ dysfunction, and outcomes of patients with**  
4 **COVID-19: A prospective observational study**  
5  
6

7 **Authors**

8 Honarmand K MD, MSc, Fiorini K MD, Chakraborty D MD, Gillett D MD, Desai K MD,  
9 Martin C MSc, MD, Bosma KJ MD, Slessarev M MD, MSc, Ball IM MD, MSc, Mele T  
10 MD, PhD, LeBlanc D MSc, Elsayed S MD, MSc, Lazo-Langer A MD, MSc, Nicholson  
11 JM MD, Arntfield R MD, Basmaji J MD  
12  
13  
14

15 **Affiliations:** Departments of Medicine (Honarmand, Fiorini, Chakraborty, Gillett, Desai,  
16 Martin, Bosma, Slessarev, Ball, Mele, LeBlanc, Lazo-Langer, Nicholson, Arntfield,  
17 Basmaji); Medical Biophysics (Slessarev); Microbiology and Infectious Diseases  
18 (Elsayed), and Epidemiology and Biostatistics (Ball, Lazo-Langer); Western University,  
19 London, Ont.  
20  
21  
22  
23  
24

25 **Corresponding author:** John Basmaji, [jbasmaji2013@meds.uwo.ca](mailto:jbasmaji2013@meds.uwo.ca)  
26

27 **Word Count:** 2456  
28  
29  
30  
31  
32  
33  
34  
35  
36  
37  
38  
39  
40  
41  
42  
43  
44  
45  
46  
47  
48  
49  
50  
51  
52  
53  
54  
55  
56

## ABSTRACT

### Background

Characterizing the multi-organ manifestations and outcomes of patients hospitalized with COVID-19 will inform resource requirements to address the long-term burden of this disease. We sought to characterize the clinical trajectory of organ dysfunction, management of disease sequelae, and short- and long-term outcomes of hospitalized patients with COVID-19.

### Methods

We conducted a prospective observational study of adult patients with COVID-19 admitted to one of two hospitals in London, Canada during the first wave of the pandemic. We recorded patients' baseline characteristics, physiological parameters, measures of organ function, and therapies administered during hospitalization in non-ICU and ICU patients, and compared the characteristics of hospital survivors to non-survivors. Finally, we recorded follow-up thoracic computerized tomography (CT) and echocardiographic findings after hospital discharge.

### Results

We enrolled 100 consecutive patients (53 women) hospitalized with COVID-19, including 32 patients who received ICU care and 68 who were treated in non-ICU settings. Respiratory sequelae were common: 23% received high flow oxygen by nasal cannula, 9% received non-invasive ventilation, 24% received invasive mechanical ventilation, and 2% received veno-venous extracorporeal membrane oxygenation. Overall, 9% of patients

1  
2 had cerebrovascular events (4% ischemic stroke, 6% intracranial hemorrhage) and 6%  
3  
4 had pulmonary embolism. After discharge, 11 of 19 patients had persistent abnormalities  
5  
6 on CT thorax and 6 of 15 had persistent cardiac dysfunction on echocardiography.  
7  
8

### 9 **Interpretation**

10  
11 COVID-19 is a multi-system disease involving neurological, cardiac, and thrombotic  
12  
13 dysfunction, without evidence of hepatic dysfunction. Patients have persistent organ  
14  
15 dysfunction after hospital discharge, underscoring the need for research on long-term  
16  
17 outcomes of COVID-19 survivors.  
18  
19  
20  
21  
22  
23  
24  
25  
26  
27  
28  
29  
30  
31  
32  
33  
34  
35  
36  
37  
38  
39  
40  
41  
42  
43  
44  
45  
46  
47  
48  
49  
50  
51  
52  
53  
54  
55

## INTRODUCTION

The typical clinical spectrum of Coronavirus disease 2019 (COVID-19), the illness caused by severe acute respiratory syndrome coronavirus 2 (SARS-CoV-2), ranges from mild respiratory symptoms to multi-organ failure and death.<sup>1, 2</sup> Emerging evidence has shown that COVID-19 is associated with a range of pulmonary and extra-pulmonary organ involvement.<sup>3</sup> Although early Canadian data shed light on the outcomes and mortality rate, data on the morbidity of hospitalized patients has been sparse and often based on retrospectively collected databases,<sup>4-6</sup> and many have excluded patients hospitalized outside the ICU setting.<sup>5-7</sup>

To characterize COVID-19's clinical course, multi-organ involvement and outcomes, prospectively collected data are required. Such data will be well suited to inform Canadian healthcare priorities as they relate to both the long-term burden of COVID-19 and future pandemics. The objectives of this study are to describe the baseline characteristics, clinical presentation, spectrum of organ dysfunction, management of disease sequelae, and clinical outcomes of hospitalized patients with COVID-19.

## METHODS

### Study Design & Setting

This prospective observational study was conducted at two sites in London Health Sciences Centre (LHSC), a 1116-bed academic, tertiary care centre in London, Canada

1  
2  
3 that is comprised of two hospitals: Victoria Hospital and University Hospital. The study  
4  
5 complied with Strengthening the Reporting of Observational Studies in Epidemiology  
6  
7 (STROBE) guidelines for reporting observational studies.<sup>8</sup>  
8  
9

## 10 11 12 **Patient Recruitment and Data Collection**

13  
14 We consecutively enrolled all adult patients (greater than 18 years of age) admitted to  
15  
16 hospital with a diagnosis of COVID-19 (confirmed by a positive PCR assay) from March  
17  
18 17, 2020 until June 18, 2020.  
19  
20  
21

22  
23 We collected data from patients and their clinical team(s), paper charts, electronic medical  
24  
25 records, and Critical Care Information System database. We recorded patients' baseline  
26  
27 demographic characteristics, physiological parameters, investigations, and therapies  
28  
29 administered throughout hospitalization in non-intensive-care unit (non-ICU) and ICU  
30  
31 settings, and overall outcome (i.e., in-hospital death versus discharge from hospital and  
32  
33 discharge destination). Finally, we recorded any echocardiography and thoracic computed  
34  
35 tomography (CT; performed for clinical indications) results up until December 31, 2020  
36  
37 (Supplementary Material Online 1).  
38  
39  
40  
41  
42  
43

## 44 **Statistical Analysis**

45  
46  
47  
48  
49  
50  
51  
52  
53  
54  
55

1  
2  
3 We used descriptive statistics (means and standard deviations, medians and interquartile  
4 ranges [IQRs], and proportions and percentages, as appropriate) to summarize patients'  
5 baseline characteristics, physiological parameters, therapies, and outcomes.  
6  
7  
8  
9  
10

11  
12 We applied the Student's t-test, Wilcoxon rank-sum test, or chi-squared statistic, as  
13 appropriate, to compare characteristics of hospital survivors to non-survivors. In addition,  
14 we compared the characteristics of patients who were initially admitted to the ICU with  
15 patients who were admitted to a non-ICU location but were transferred to ICU due to  
16 clinical deterioration. We selected predictor variables based on prior retrospective data  
17 demonstrating an association between the variables and outcome of interest.<sup>1, 9</sup> They  
18 included age, vital signs at emergency department (ED) triage, laboratory data obtained  
19 on admission such as blood pH, white blood cell count, hemoglobin, platelets, lymphocyte  
20 count, lactate, ferritin, lactate dehydrogenase (LDH), c-reactive protein (CRP), and  
21 troponin levels. All statistical tests are two-sided with the threshold of statistical  
22 significance set at a p-value of less than 0.05. We performed all data analyses using  
23 Statistical Package for Social Sciences (SPSS) version 25.0 (IBM, Armonk, N.Y.).  
24  
25  
26  
27  
28  
29  
30  
31  
32  
33  
34  
35  
36  
37  
38

### 39 **Ethics Approval**

40  
41 Western University's Research Ethics Board approved the conduct of this study (Study  
42 number: 115732; date: April 1, 2020).  
43  
44  
45  
46  
47

## 48 **RESULTS**

49  
50  
51  
52  
53  
54  
55



## Baseline Characteristics

Between March 17<sup>th</sup> to June 18<sup>th</sup>, 2020, 101 patients were admitted to one of the participating hospitals with a positive for SARS-CoV-2 test. Of those, one patient declined to participate in the study. We included 100 patients (32 ICU and 68 non-ICU patients). An overview of the recruitment procedures is seen in figure 1. **Table 1** presents patients' baseline characteristics of patients.

## Clinical Presentation

**Table 2** presents patients' clinical characteristics at the time of hospital admission. Symptoms reported by more than 50% of patients at the time of hospitalization for COVID-19 were cough, dyspnea, fever, and fatigue. At the time of emergency department (ED) assessment, 44.2% (42/95) of patients presented with a respiratory rate (RR) > 20 breaths per minute) and 33/98 (33.7%) received supplemental oxygen therapy in the ED to maintain oxygen saturation levels above 92%.

Twenty patients were admitted to the ICU while 80 patients were admitted to the ward. Among the 80 patients initially admitted to the ward, 12 were eventually transferred to ICU after a median hospital stay of 0.5 days (IQR 0 to 2). Ultimately, 32 patients received ICU admission. An overview of the patient's clinical disposition while in hospital is shown in **Figure 1**.

## Complications & Management by Organ System

### *Respiratory complications & therapies*

**Table 3** shows the respiratory complications and therapies received during hospitalization. Among all 100 patients, 79 (79%) received supplemental oxygen therapy including high flow nasal cannula (HFNC; 23/100), non-invasive ventilation (9/100), invasive mechanical ventilation (24/100), and veno-venous extracorporeal membrane oxygenation (2/100). Prone positioning included awake self-proning in non-ICU patients (4 of 68 patients) and standard proning of ventilated patients in the ICU (13/30). Most ICU patients (24/32) received invasive mechanical ventilation with a median duration of 14 days (IQR 11 to 22).

Twenty-six patients underwent CT thorax scans. The most common findings were bilateral diffuse ground glass opacities, bilateral consolidations, and new fibrosis/bronchiectasis (**Table 3**). Lung ultrasonography (LUS) was performed 30 patients, with the most common abnormalities included thickened, irregular pleural line consistent with an inflammatory process, bilateral alveolar-interstitial syndrome (B-lines), and pulmonary consolidation (**Table 3**). Consolidation on LUS was more likely to be identified in mechanically ventilated patients than in those not on mechanical ventilation (75% vs 33%,  $p = 0.025$ , OR 6.0, 95% CI 1.17 to 30.73).

### *Neurologic complications*

1  
2  
3 **Table 4** summarizes the short-term neurologic complications among 26 patients (10 non-  
4 ICU, 16 ICU) who underwent head CT scanning during hospitalization at the discretion  
5 of the treating physician. Three of 26 patients suffered an ischemic stroke, while 6 of 26  
6 patients suffered intracerebral hemorrhage (ICH).  
7  
8  
9

### 10 *Thrombotic complications & therapies*

11  
12  
13  
14  
15  
16 Thrombotic complications and therapies are shown in **Table 4**. Of the thirteen (4 non-  
17 ICU, 9 ICU) who underwent Doppler ultrasound, two ICU patients had a deep venous  
18 thrombosis. Twenty-six patients (12 non-ICU and 14 ICU) underwent CT pulmonary  
19 angiography at the discretion of the treating physician. Of these, 6 had pulmonary  
20 embolism (3 of 68 non-ICU patients and 3 of 32 ICU patients). Eleven (11%) patients  
21 received therapeutic anticoagulation during their hospitalization: 3 empirically for  
22 suspected COVID-19 associated hypercoagulable state (at the discretion of the treating  
23 physician), seven for confirmed venous thromboembolic (VTE) disease, and 1 for ECMO  
24 circuit.  
25  
26  
27  
28  
29  
30  
31  
32  
33  
34  
35  
36  
37  
38

### 39 *Cardiac and hemodynamic complications & therapies*

40  
41 Among 32 ICU patients, 24 (75%) received vasopressor therapy for a median of 7.5 days  
42 (IQR 2.3 to 10.8). Four patients received hydrocortisone for refractory shock (**Table 4**).  
43  
44 Twenty-nine patients underwent echocardiography during their hospital stay (including  
45 both point-of-care and diagnostic). Overall, 4 (13.8%) patients had new left ventricular  
46  
47  
48  
49  
50

1  
2  
3 dysfunction and 9 (31.0%) patients had new right ventricular (RV) dysfunction (defined  
4  
5 as either new systolic failure and/or pulmonary hypertension).  
6  
7

### 8 9 *Hepatic complications*

10  
11 Alanine aminotransferase (ALT) levels were used as a surrogate marker for hepatic  
12  
13 dysfunction in COVID-19 patients. The highest ALT measured for all study participants  
14  
15 during hospital admission was 31 U/L (IQR 22 to 82).  
16  
17

### 18 19 20 *Renal complications & therapies*

21  
22 Twenty-seven (27%) patients (non-ICU: 11/32 [16.1%]; ICU: 16/32 [50%]) developed an  
23  
24 acute kidney injury (AKI) defined by Acute Kidney Injury (AKIN) criteria.<sup>10</sup> Among ICU  
25  
26 patients, 5 received continuous renal replacement therapy (CRRT) for an average of 4.2  
27  
28 days (SD = 2.59) (**Table 4**). At the time of hospital discharge, 3 of 66 patients (4.5%) had  
29  
30 persistent renal injury.  
31  
32  
33  
34  
35  
36

### 37 38 *Secondary infections*

39  
40 Fifteen of 100 (15%) patients had an initially negative COVID-19 real-time PCR test,  
41  
42 which was subsequently positive on repeat testing. Twelve (12%) patients developed  
43  
44 concomitant bacterial respiratory infection, and 1 (1%) patient developed non-Candida  
45  
46 fungal respiratory infection. Eight (8%) patients had at least 1 positive blood culture  
47  
48  
49  
50  
51

1  
2  
3 consistent with non-contaminant bacteremia, and 1 (1%) patient developed *Clostridioides*  
4  
5 *difficile* infection (Table 4).  
6  
7  
8

### 9 10 **Characteristics of patients who received transfer to ICU after hospital admission**

11  
12 Twelve of 100 patients (12%) were initially admitted to the ward but were subsequently  
13  
14 transferred to ICU due to clinical decompensation shortly after hospitalization (median  
15  
16 0.5 days, IQR 0 to 2). Compared to patients who remained in a non-ICU location (n=68),  
17  
18 patients transferred to ICU were younger (median 63 years, IQR 53.75 to 68, versus  
19  
20 median 76 years, IQR 60.3 to 84.8,  $p = 0.01$ ). Patients initially admitted to a non-ICU  
21  
22 location who were later transferred to ICU were more likely to be febrile ( $\geq 38^{\circ}\text{C}$ , 75% vs  
23  
24 28.4%,  $p = 0.003$ ) and to have a respiratory rate (RR)  $\geq 24$  breaths/ minute (72.7% vs.  
25  
26 34.3%,  $p = 0.02$ ) on triage vital signs at presentation to hospital.  
27  
28  
29  
30  
31  
32

### 33 **Patient Outcomes**

34  
35 Patient outcomes and post-discharge imaging results are shown in Table 5. Thirty-four of  
36  
37 100 patients (34%) died in hospital, including 20 of 68 non-ICU patients (29.4%) and 14  
38  
39 of 32 ICU patients (43.8%). Persistent abnormalities were observed in 11 of the 19  
40  
41 patients who had CT scans of the thorax after discharge from hospital (median duration  
42  
43 of follow-up 108 days, IQR 41.75 to 187.75). Similarly, 15 patients had repeat  
44  
45 echocardiograms after discharge from hospital (duration of follow-up 81 days, IQR 57 to  
46  
47  
48  
49  
50  
51  
52  
53  
54  
55

1  
2  
3 181), of which one had persistent left ventricular dysfunction and five had persistent right  
4  
5 ventricular dysfunction.  
6  
7  
8  
9

## 10 **Comparing Survivors and Non-Survivors**

11  
12 We compared baseline characteristics of patients who survived to hospital discharge to  
13  
14 those who did not. Non-survivors were older (median 80 years [IQR 71.5 to 87.5] vs. 68.5  
15  
16 years [IQR 54.0 to 77.3],  $p < 0.01$ ), more frequently presented with tachycardia (88.9 %  
17  
18 vs 24.1%,  $p < 0.01$ ), and more frequently received supplemental oxygen on presentation  
19  
20 to ED (50% vs 26.6%,  $p = 0.02$ ). On hospital admission, non-survivors were more  
21  
22 frequently acidemic ( $\text{pH} < 7.35$ ) (34.5% vs 17.8%,  $p = 0.04$ ), had a higher white count  
23  
24 ( $10.6 \times 10^9/\text{L}$  [7.1 to 14.3] vs  $6.7 \times 10^9/\text{L}$  [IQR 4.8 to 8.7],  $p < 0.01$ ), a lower hemoglobin  
25  
26 ( $124 \text{ g/L}$  [IQR 113 to 135] vs  $134 \text{ g/L}$  [IQR 123.3 to 145.8],  $p = 0.03$ ) and higher troponin  
27  
28 ( $28 \text{ ng/L}$  [IQR 14.5 to 75.5] vs  $18$  [IQR 8.5 to 29.5],  $p < 0.01$ ).  
29  
30  
31  
32  
33  
34

## 35 **INTERPRETATION**

36  
37 COVID-19 was initially believed to be an isolated respiratory disease, but emerging  
38  
39 reports have suggested that multi-organ involvement may be more common.<sup>3</sup> The full  
40  
41 spectrum of organ involvement and their associated outcomes in patients with COVID-19  
42  
43 remain relatively understudied. In this prospective, observational study of hospitalized  
44  
45 with COVID-19, we found a range of pulmonary and extra-pulmonary complications in  
46  
47 both ICU and non-ICU patients. Patients had a high prevalence of neurologic  
48  
49  
50

1  
2 complications, thrombotic complications, right ventricular dysfunction, and persistent  
3 cardiopulmonary pathology after hospital discharge.  
4  
5  
6  
7  
8

9 In our study, nearly 10% of patients had a cerebrovascular complication. Other studies  
10 reported the prevalence of ischemic stroke to be 2% to 6%,<sup>11, 12</sup> compared to 9% in our  
11 cohort. One possible explanation for this phenomenon is that viral infections can result in  
12 an inflammatory cascade and endothelial injury that increase the risk of arterial thrombotic  
13 events.<sup>13, 14</sup> We also identified intracerebral hemorrhage as a potential sequelae of  
14 COVID-19, with 6% of patients of patients developing ICU in our cohort.<sup>15</sup> Intracerebral  
15 hemorrhage is hypothesized be due to the binding of SARS-Cov-2 to angiotensin  
16 converting enzyme II (ACE-II) receptors on endothelial cells of intracranial blood vessels,  
17 resulting in inflammation and disruption of vasculature integrity.<sup>16-18</sup>  
18  
19  
20  
21  
22  
23  
24  
25  
26  
27  
28  
29  
30  
31  
32

33 In our cohort, thrombotic events (ischemic stroke, deep venous thrombosis, and  
34 pulmonary embolism) occurred in 6% of non-ICU patients and 19% in ICU patients.  
35 Estimates of thrombotic events in hospitalised patients with COVID-19 have ranged from  
36 5%,<sup>19</sup> to as high as 33%.<sup>20, 21</sup> Several mechanisms, including the complement pathway,  
37 neutrophil extracellular traps, inflammatory cytokines, and endothelial dysfunction may  
38 explain why patients with COVID-19 could be hypercoagulable.<sup>22, 23</sup> Given the prevalence  
39 of thrombotic events, there may be value for routine surveillance as part of the routine  
40 clinical care of COVID-19 patients. While there is currently no evidence to support the  
41  
42  
43  
44  
45  
46  
47  
48  
49  
50

1  
2  
3 routine use of anticoagulation,<sup>24</sup> antiplatelet therapy or systemic therapeutic  
4  
5 anticoagulation may hold promise as a treatment for COVID-19, particularly in those with  
6  
7 severe disease.<sup>25</sup>  
8

9  
10 There is a relative paucity of data describing the incidence of right ventricular dysfunction  
11  
12 (RVD), manifesting as either and pulmonary hypertension, systolic failure, or dilatation  
13  
14 in patients with COVID-19. In one observational study, the prevalence of PH was 12% in  
15  
16 hospitalized non-ICU COVID-19 patients.<sup>26</sup> Conversely, we found that 31% of  
17  
18 hospitalized patients had evidence of PH. While RV dysfunction has been described in  
19  
20 patients with ARDS, the prevalence of RV dysfunction in our study is higher than what  
21  
22 has been reported in non-COVID-19 patients with ARDS.<sup>27-29</sup> It is possible that COVID-  
23  
24 19 associated RV dysfunction may be pathologically distinct for several reasons. First,  
25  
26 macro- and microvascular thrombosis due to deranged coagulation pathways could induce  
27  
28 RV dysfunction. Second, 'permissive hypoxia' as a treatment strategy may increase the  
29  
30 prevalence of RV dysfunction.<sup>30,31</sup> Similarly, we found evidence for long-term pulmonary  
31  
32 complications associated with COVID-19 beyond hospital discharge. Abnormalities such  
33  
34 as bronchiectasis, fibrosis or scarring were found in 57% of patients who underwent CT  
35  
36 thorax imaging after hospital discharge for clinical reasons in our cohort. While  
37  
38 pulmonary fibrosis has been reported in several small cohorts,<sup>32</sup> our study reinforces the  
39  
40 notion that respiratory dysfunction can be prevalent and persistent.  
41  
42  
43  
44  
45  
46  
47  
48  
49  
50  
51  
52  
53  
54  
55  
56



1  
2  
3 These findings highlight the need to elucidate the true prevalence and potential  
4 mechanisms of extra-pulmonary complications associated with COVID-19, particularly  
5 neurological, thrombotic, and cardiac manifestations. Future studies should work to  
6 identify the patient phenotype where the benefits of anticoagulation will outweigh the  
7 risk. The prevalence of acute and long-term RV dysfunction highlights the need to balance  
8 the respiratory support from positive pressure ventilation with the adverse mechanical  
9 effects it frequently imposes on right ventricular function. Lastly, While the acute  
10 inpatient management of COVID-19 has garnered attention among the scientific  
11 community, future research should prioritize characterization of the long-term pulmonary  
12 and extra-pulmonary complications of COVID-19.  
13  
14  
15  
16  
17  
18  
19  
20  
21  
22  
23  
24  
25  
26  
27

## 28 **Limitations**

29  
30 Limitations with any observational study such as this one includes the inability to draw  
31 any conclusions about the associations of any specific treatment with outcomes.  
32 Furthermore, a larger cohort study is required to conduct multivariate analyses. This study  
33 has several strengths. We included a cohort of ICU and non-ICU patients across a  
34 spectrum of disease severity. Standardized diagnostic microbiologic methods were used  
35 to define COVID-19 positivity. Consecutive prospective enrollment reduced selection  
36 bias and improved the fidelity of data collection. Furthermore, the prospective nature of  
37 our data provides a better understanding of pulmonary and extra-pulmonary  
38  
39  
40  
41  
42  
43  
44  
45  
46  
47  
48  
49  
50

1  
2  
3 manifestations as well as its management. Finally, we provide post-hospital discharge data  
4  
5 on the clinical outcomes of patients after hospital discharge.  
6  
7  
8

## 9 **Conclusion**

10  
11 In summary, this study provides further evidence that COVID-19 is a multi-system  
12  
13 disease that results in neurologic, cardiac, and thrombotic complications in the acute phase  
14  
15 as well as pulmonary complications that persist beyond the hospitalization. These findings  
16  
17 underscore the need to prioritize research on the long-term outcomes and management of  
18  
19 COVID-19 survivors.  
20  
21  
22  
23  
24  
25  
26  
27  
28  
29  
30  
31  
32  
33  
34  
35  
36  
37  
38  
39  
40  
41  
42  
43  
44  
45  
46  
47  
48  
49  
50  
51  
52  
53  
54  
55

1  
2  
3 **Conflicts of Interest:** The authors declare no conflicts of interest.  
4

5 **Funding:** This study was funded by a grant provided by Lawson Health Research  
6 Institute's Internal Research Funds (IRF-0665). The funders had no role in the collection,  
7 analysis, interpretation or dissemination of the study data  
8

9 **Contributors:** KH and JB conceived and designed the study and oversaw all study  
10 conduct. IB, KH, JB, and KB obtained funding for the study. KH, JB, KF, DC, DG, KD,  
11 and DL participated in data collection and database management. KH and JB conducted  
12 data analysis. KH, JB, KB, MS, and CM prepared the initial draft of the manuscript. All  
13 authors contributed to manuscript preparation/ revision, approve the final version to be  
14 published and agree to be accountable for all aspects of the work.  
15  
16

17 **Data Sharing Statement:** All data will be available upon request.  
18  
19  
20  
21  
22  
23  
24  
25  
26  
27  
28  
29  
30  
31  
32  
33  
34  
35  
36  
37  
38  
39  
40  
41  
42  
43  
44  
45  
46  
47  
48  
49  
50  
51  
52  
53  
54  
55  
56

## References

1. Chen N, Zhou M, Dong X, et al. Epidemiological and clinical characteristics of 99 cases of 2019 novel coronavirus pneumonia in Wuhan, China: a descriptive study. *Lancet* 2020;395(10223):507-13.
2. Guan WJ, Ni ZY, Hu Y, et al. Clinical Characteristics of Coronavirus Disease 2019 in China. *N Engl J Med* 2020;382(18):1708-20.
3. Roberts CM, Levi M, McKee M, et al. COVID-19: a complex multisystem disorder. *Br J Anaesth* 2020;125(3):238-42.
4. Cavayas YA, Noel A, Brunette V, et al. Early experience with critically ill patients with COVID-19 in Montreal. *Can J Anaesth* 2021;68(2):204-13.
5. Mitra AR, Fergusson NA, Lloyd-Smith E, et al. Baseline characteristics and outcomes of patients with COVID-19 admitted to intensive care units in Vancouver, Canada: a case series. *CMAJ* 2020;192(26):E694-E701.
6. Yang SS, Lipes J, Dial S, et al. Outcomes and clinical practice in patients with COVID-19 admitted to the intensive care unit in Montreal, Canada: a descriptive analysis. *CMAJ Open* 2020;8(4):E788-E95.
7. Verma AA, Hora T, Jung HY, et al. Characteristics and outcomes of hospital admissions for COVID-19 and influenza in the Toronto area. *CMAJ* 2021;193(12):E410-E8.
8. von Elm E, Altman DG, Egger M, et al. The Strengthening the Reporting of Observational Studies in Epidemiology (STROBE) statement: guidelines for reporting observational studies. *J Clin Epidemiol* 2008;61(4):344-9.
9. Zhou F, Yu T, Du R, et al. Clinical course and risk factors for mortality of adult inpatients with COVID-19 in Wuhan, China: a retrospective cohort study. *Lancet* 2020;395(10229):1054-62.
10. Mehta RL, Kellum JA, Shah SV, et al. Acute Kidney Injury Network: report of an initiative to improve outcomes in acute kidney injury. *Crit Care* 2007;11(2):R31.
11. Mao L, Jin H, Wang M, et al. Neurologic Manifestations of Hospitalized Patients With Coronavirus Disease 2019 in Wuhan, China. *JAMA Neurol* 2020;77(6):683-90.
12. Merkler AE, Parikh NS, Mir S, et al. Risk of Ischemic Stroke in Patients With Coronavirus Disease 2019 (COVID-19) vs Patients With Influenza. *JAMA Neurol* 2020.
13. Boehme AK, Luna J, Kulick ER, et al. Influenza-like illness as a trigger for ischemic stroke. *Ann Clin Transl Neurol* 2018;5(4):456-63.
14. Fraser DD, Patterson EK, Slessarev M, et al. Endothelial Injury and Glycocalyx Degradation in Critically Ill Coronavirus Disease 2019 Patients: Implications for Microvascular Platelet Aggregation. *Crit Care Explor* 2020;2(9):e0194.
15. Cheruiyot I, Sehmi P, Ominde B, et al. Intracranial hemorrhage in coronavirus disease 2019 (COVID-19) patients. *Neurol Sci* 2021;42(1):25-33.

16. Pavlov V, Beylerli O, Gareev I, et al. COVID-19-Related Intracerebral Hemorrhage. *Front Aging Neurosci* 2020;12:600172.
17. Fayed I, Pivazyan G, Conte AG, et al. Intracranial hemorrhage in critically ill patients hospitalized for COVID-19. *J Clin Neurosci* 2020;81:192-5.
18. Bengler M, Williams O, Siddiqui J, et al. Intracerebral haemorrhage and COVID-19: Clinical characteristics from a case series. *Brain Behav Immun* 2020;88:940-4.
19. Elbadawi A, Elgendy IY, Sahai A, et al. Incidence and Outcomes of Thrombotic Events in Symptomatic Patients With COVID-19. *Arterioscler Thromb Vasc Biol* 2021;41(1):545-7.
20. Bilaloglu S, Aphinyanaphongs Y, Jones S, et al. Thrombosis in Hospitalized Patients With COVID-19 in a New York City Health System. *JAMA* 2020;324(8):799-801.
21. Klok FA, Kruip M, van der Meer NJM, et al. Confirmation of the high cumulative incidence of thrombotic complications in critically ill ICU patients with COVID-19: An updated analysis. *Thromb Res* 2020;191:148-50.
22. Fraser DD, Cepinskas G, Slessarev M, et al. Inflammation Profiling of Critically Ill Coronavirus Disease 2019 Patients. *Crit Care Explor* 2020;2(6):e0144.
23. Abou-Ismaïl MY, Diamond A, Kapoor S, et al. The hypercoagulable state in COVID-19: Incidence, pathophysiology, and management. *Thromb Res* 2020;194:101-15.
24. INSPIRATION Investigators, Sadeghipour P, Talasaz AH, et al. Effect of Intermediate-Dose vs Standard-Dose Prophylactic Anticoagulation on Thrombotic Events, Extracorporeal Membrane Oxygenation Treatment, or Mortality Among Patients With COVID-19 Admitted to the Intensive Care Unit: The INSPIRATION Randomized Clinical Trial. *JAMA* 2021;325(16):1620-30.
25. Chow JH, Khanna AK, Kethireddy S, et al. Aspirin Use Is Associated With Decreased Mechanical Ventilation, Intensive Care Unit Admission, and In-Hospital Mortality in Hospitalized Patients With Coronavirus Disease 2019. *Anesth Analg* 2021;132(4):930-41.
26. Pagnesi M, Baldetti L, Beneduce A, et al. Pulmonary hypertension and right ventricular involvement in hospitalised patients with COVID-19. *Heart* 2020;106(17):1324-31.
27. Vieillard-Baron A, Schmitt JM, Augarde R, et al. Acute cor pulmonale in acute respiratory distress syndrome submitted to protective ventilation: incidence, clinical implications, and prognosis. *Crit Care Med* 2001;29(8):1551-5.
28. Li DK, Mao JY, Long Y, et al. Pulmonary hypertension with adult respiratory distress syndrome: prevalence, clinical impact, and association with central venous pressure. *Pulm Circ* 2020;10(3):2045894020933087.
29. Boissier F, Katsahian S, Razazi K, et al. Prevalence and prognosis of cor pulmonale during protective ventilation for acute respiratory distress syndrome. *Intensive Care Med* 2013;39(10):1725-33.

1  
2  
3  
4  
5  
6  
7  
8  
9  
10  
11  
12  
13  
14  
15  
16  
17  
18  
19  
20  
21  
22  
23  
24  
25  
26  
27  
28  
29  
30  
31  
32  
33  
34  
35  
36  
37  
38  
39  
40  
41  
42  
43  
44  
45  
46  
47  
48  
49  
50  
51  
52  
53  
54  
55

30. Dhont S, Derom E, Van Braeckel E, et al. The pathophysiology of 'happy' hypoxemia in COVID-19. *Respir Res* 2020;21(1):198.

31. Pak O, Aldashev A, Welsh D, et al. The effects of hypoxia on the cells of the pulmonary vasculature. *Eur Respir J* 2007;30(2):364-72.

32. Ojo AS, Balogun SA, Williams OT, et al. Pulmonary Fibrosis in COVID-19 Survivors: Predictive Factors and Risk Reduction Strategies. *Pulm Med* 2020;2020:6175964.

Confidential

Figure 1: Overview of Patient Enrollment and Disposition

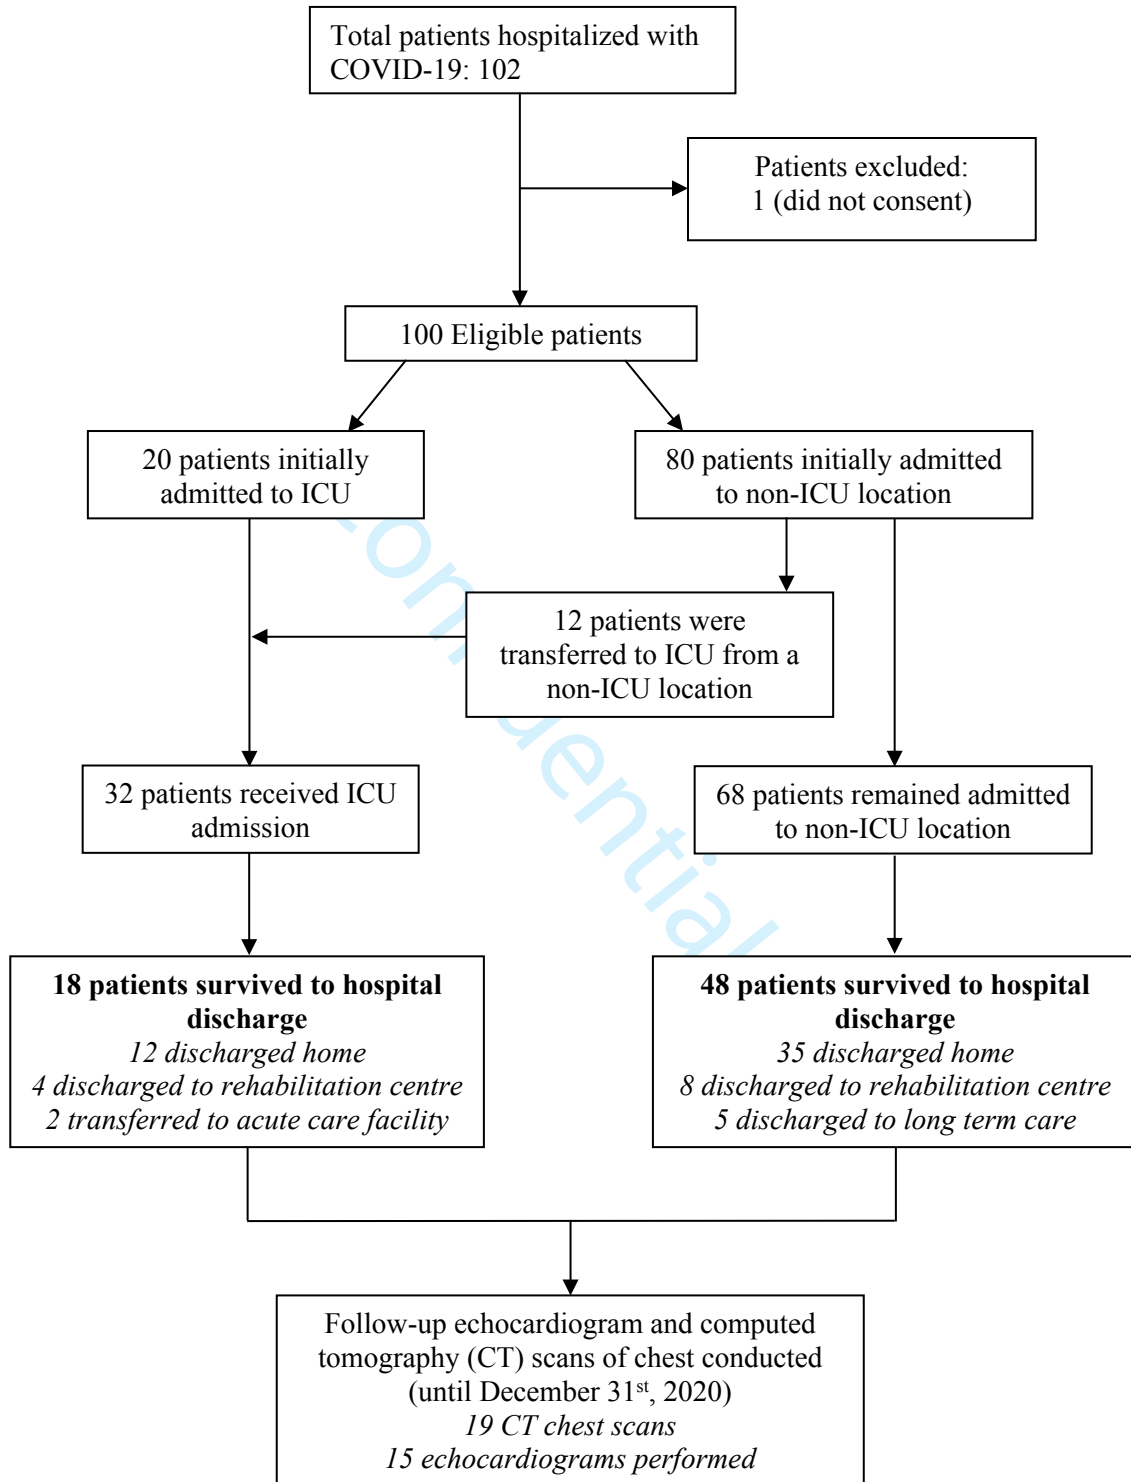

**Table 1.** Patients' baseline characteristics.

| Characteristic                        | All patients<br>N = 100 | Non-ICU patients<br>N = 68 | ICU patients<br>N = 32 |
|---------------------------------------|-------------------------|----------------------------|------------------------|
| <b>Demographic Characteristics</b>    |                         |                            |                        |
| Age - median (IQR)                    | 74 (56,83)              | 76 (60, 85)                | 63 (55,74)             |
| Male sex - no (%)                     | 53 (53%)                | 34 (50.0)                  | 19 (59.4)              |
| Body mass index, mean (SD)            | 29.2 (8.2)<br>n = 84    | 28.1 (7.9)<br>n = 56       | 31.4 (8.5)<br>n = 28   |
| <b>Pre-admission Location - n (%)</b> |                         |                            |                        |
| Home                                  | 66 (66)                 | 41 (60.3)                  | 25 (78.1)              |
| Long-term care facility               | 28 (28)                 | 24 (35.3)                  | 4 (12.5)               |
| Retirement home                       | 1 (1)                   | 1 (1.5)                    | 0                      |
| Other                                 | 5 (5)                   | 2 (2.9)                    | 3 (9.4)                |
| <b>Comorbidities - n (%)</b>          |                         |                            |                        |
| Chronic cardiac disease               | 24 (24)                 | 17 (25.0)                  | 7 (21.9)               |
| Chronic pulmonary/ lung disease       | 17 (17)                 | 14 (20.6)                  | 3 (9.4)                |
| Asthma                                | 15 (15)                 | 10 (14.7)                  | 5 (15.6)               |
| Chronic renal/ kidney disease         | 15 (15)                 | 10 (14.7)                  | 5 (15.6)               |
| Liver disease                         | 4 (4)                   | 2 (2.9)                    | 2 (6.3)                |
| Chronic neurological disorder         | 6 (6)                   | 5 (7.4)                    | 1 (3.1)                |
| Cancer [active only]                  | 9 (9)                   | 7 (10.3)                   | 2 (6.3)                |
| History of cancer [in remission]      | 8 (8)                   | 7 (10.3)                   | 1 (3.1)                |
| Obesity                               | 11 (11)                 | 7 (10.3)                   | 4 (12.5)               |
| Diabetes                              | 30 (30)                 | 19 (27.9)                  | 11 (34.4)              |
| Dementia [any etiology]               | 16 (16)                 | 15 (22.1)                  | 1 (3.1)                |
| Other comorbidities                   | 7 (7)                   | 5 (7.4)                    | 2 (6.3)                |
| <b>Habits - n (%)</b>                 |                         |                            |                        |
| Current smoker                        | 9 (9)                   | 7 (10.3)                   | 2 (6.3)                |
| Ex-smoker                             | 28 (28)                 | 22 (32.4)                  | 6 (18.8)               |
| Alcohol use                           | 4 (4)                   | 4 (5.9)                    | 0                      |
| Illicit drug use                      | 1 (1)                   | 1 (1.5)                    | 0                      |
| <b>Exposure History - n (%)</b>       |                         |                            |                        |
| Contact with confirmed case           | 30 (30)                 | 23 (33.8)                  | 7 (21.9)               |
| Contact with suspected case           | 9 (9)                   | 5 (7.4)                    | 4 (12.5)               |
| Travel outside Canada                 | 9 (9)                   | 6 (8.8)                    | 3 (9.4)                |
| Travel within Canada                  | 1 (1)                   | 0                          | 1 (3.1)                |

ICU: intensive care unit; IQR: interquartile range; SD: standard deviation.



**Table 2.** Clinical characteristics at the time of presentation to hospital.

| Characteristic                                                | All patients<br>N = 100 | Non-ICU patients<br>N = 68 | ICU patients<br>N = 32 |
|---------------------------------------------------------------|-------------------------|----------------------------|------------------------|
| <b>Presenting symptom for &gt; 20% of patients - n (%)</b>    |                         |                            |                        |
| Cough                                                         | 71 (71)                 | 50 (73.5)                  | 21 (65.6)              |
| Fever                                                         | 62 (62)                 | 37 (54.4)                  | 25 (78.1)              |
| Dyspnea                                                       | 63 (63)                 | 40 (58.8)                  | 23 (71.9)              |
| Fatigue                                                       | 51 (51)                 | 35 (51.5)                  | 16 (50.0)              |
| Diarrhea                                                      | 32 (32)                 | 23 (33.8)                  | 9 (28.1)               |
| Myalgia                                                       | 25 (25)                 | 13 (19.1)                  | 12 (37.5)              |
| Headache                                                      | 23 (23)                 | 13 (19.1)                  | 10 (31.3)              |
| <b>Vital signs at hospital presentation - n/ N (%)</b>        |                         |                            |                        |
| Temperature > 38 C                                            | 36/ 98 (36.7)           | 19/ 67 (28.4)              | 17/31 (54.8)           |
| Heart rate > 100                                              | 31/ 96 (32.3)           | 18/ 66 (27.3)              | 13/ 30 (43.3)          |
| Systolic blood pressure < 90 mm Hg                            | 3/ 98 (3.1)             | 2/67 (3.0)                 | 1/ 30 (3.3)            |
| Respiratory rate > 24 breaths/ min                            | 42/ 95 (44.2)           | 23/ 67 (34.3%)             | 19/ 28 (67.9)          |
| Oxygen saturation < 92%                                       | 20/98 (20.4)            | 8/ 67 (11.9)               | 12/ 31 (38.7)          |
| Supplemental oxygen therapy at clinical presentation          | 35/ 99 (35.4)           | 18/ 67 (26.9)              | 17/ 32 (53.1)          |
| <b>Laboratory results at hospital presentation, mean (SD)</b> |                         |                            |                        |
| Leukocyte count - x10 <sup>9</sup> /L                         | 10.6 (13.2)             | 11.0 (15.4)                | 10.0 (6.1)             |
| Lymphocyte count - x10 <sup>9</sup> /L                        | 3.3 (12.9)              | 4.2 (15.5)                 | 1.3 (1.3)              |
| Creatinine - umol/L                                           | 110.5 (80.1)            | 106.9 (62.6)               | 118.5 (110.8)          |
| LDH - U/L                                                     | 416.3 (253.0)           | 367.4 (177.5)              | 563.0 (391.1)          |
| Ferritin - ug/L                                               | 1702.6 (2154.4)         | 1772.1 (2372.3)            | 1424.4 (998.2)         |
| CRP - mg/L                                                    | 97.6 (83.5)             | 87.9 (75.8)                | 126.8 (101.9)          |
| D-dimer - ug/L                                                | 1198.9 (1311.5)         | 956.0 (789.4)              | 1603.7 (2093.1)        |
| Troponin - ng/L                                               | 31.8 (42.1)             | 36.3 (46.8)                | 18.1 (17.5)            |
| Fibrinogen - g/L                                              | 7.5 (0.5)               | 7.4 (0.7)                  | NA*                    |
| pH on blood gas                                               | 7.4 (0.1)               | 7.4 (0.1)                  | 7.4 (0.1)              |

\* one data point only.

ICU: intensive care unit; SD: standard deviation; ER: emergency department; LDH: lactate dehydrogenase; CRP: C-reactive protein.

**Table 3.** Pulmonary complications and management among hospitalized COVID-19 patients.

| Complications & Management                              | All patients  | Non-ICU patients | ICU patients        |
|---------------------------------------------------------|---------------|------------------|---------------------|
| <b>Clinical parameters</b>                              |               |                  |                     |
| PF ratio < 150 mm Hg – n (%)                            | NA            | NA               | 27/ 32 (84.4)       |
| PF ratio < 150 mm Hg – days median (IQR)                | NA            | NA               | 8 (4, 15)           |
| <b>CT chest findings - n/ N (%)</b>                     |               |                  |                     |
| Localized Ground Glass Opacities                        | 4/ 26 (15.4)  | 3/ 12 (25)       | 1/ 14 (7.1)         |
| Diffuse Ground Glass Opacities                          | 14/ 26 (53.8) | 5/ 12 (41.7)     | 9/ 14 (64.3)        |
| Unilateral consolidation/infiltration                   | 2/ 26 (7.7)   | 1/ 12 (8.3)      | 1/ 14 (7.1)         |
| Bilateral consolidation/infiltration                    | 14/ 26 (53.8) | 7/ 12 (58.3)     | 7/ 14 (50.0)        |
| Unilateral pleural effusion                             | 2/ 26 (7.7)   | 0/ 12 (0)        | 2/ 14 (14.3)        |
| Bilateral pleural effusion                              | 3/ 26 (11.5)  | 2/ 12 (16.7)     | 1/ 14 (7.1)         |
| Emphysematous changes or bronchiectasis                 | 4/ 26 (15.4)  | 2/ 12 (16.7)     | 2/ 14 (14.3)        |
| Scarring or fibrosis                                    | 4/ 26 (15.4)  | 0/ 12 (0)        | 4/ 14 (28.6)        |
| Organizing pneumonia pattern                            | 2/ 16 (7.7)   | 1/ 12 (8.3)      | 1/ 14 (7.1)         |
| <b>Lung Ultrasound Findings - n/ N (%)</b>              |               |                  |                     |
| Irregular pleural line                                  | 26/ 30 (86.7) | 5/ 7 (71.4)      | 21/ 23 (91.3)       |
| Alveolar-interstitial syndrome (B-lines)                | 28/ 30 (93.3) | 5/ 7 (71.4)      | 23/ 23 (100)        |
| Consolidation                                           | 12/ 30 (40)   | 0/ 6 (0)         | 12/ 24 (52.2)       |
| Unilateral                                              | 2/ 12 (16.7)  | 0/ 6 (0)         | 2/ 12 (16.7)        |
| Bilateral                                               | 10/ 12 (83.3) | 0/ 6 (0)         | 10/ 12 (83.3)       |
| Moderate-large pleural effusion                         | 2/ 30 (6.7)   | 0/ 7 (0)         | 2/ 23 (8.7)         |
| <b>Respiratory Therapies - n/ N (%)</b>                 |               |                  |                     |
| Received oxygen therapy                                 | 79/ 100 (79)  | 47/ 68 (69.1)    | 32/ 32 (100.0)      |
| High-flow nasal cannula                                 | 23/ 100 (23)  | 5/ 68 (7.4)      | 18/ 32 (56.3)       |
| Non-invasive ventilation                                | 9/ 100 (9)    | 1/ 68 (1.5)      | 8/ 32 (25.0)        |
| Mechanical ventilation                                  | 24/ 100 (24)  | 0/ 68 (0)        | 24/ 32 (75.0)       |
| Duration of mechanical ventilation - days, median (IQR) | NA            | NA               | 14 (10, 22)<br>n=26 |
| Prone positioning                                       | 17/ 98 (17.4) | 4/ 68 (5.9)      | 13/ 30 (43.3)       |
| Neuromuscular blocking agents                           | NA            | NA               | 18/ 32<br>(56.3)    |
| Steroids for respiratory failure                        | 8/ 100 (8)    | 4/ 68 (5.9)      | 4/ 32 (12.5)        |
| VV-ECMO                                                 | NA            | NA               | 2/ 32 (6.3)         |

ICU: intensive care unit; PF ratio: PaO<sub>2</sub>/FiO<sub>2</sub> ratio; IQR: interquartile range; CT: computerized tomography; VV-ECMO: veno-venous extracorporeal membrane oxygenation.

**Table 4.** Extra-pulmonary complications among hospitalized COVID-19 patients.

| <b>Complications &amp; Management</b>                          | <b>All patients<br/>N=100</b> | <b>Non-ICU<br/>patients<br/>N=68</b> | <b>ICU patients<br/>N=32</b> |
|----------------------------------------------------------------|-------------------------------|--------------------------------------|------------------------------|
| <b>Neurological complications - n/ N (%)</b>                   |                               |                                      |                              |
| Ischemic stroke                                                | 3/ 26 (11.5)                  | 1/ 10 (10)                           | 2/ 16 (12.5)                 |
| Intracranial hemorrhage                                        | 6/ 26 (23.0)                  | 0                                    | 6/ 16 (37.5)                 |
| <b>Thrombotic complications &amp; therapies - n (%)</b>        |                               |                                      |                              |
| Deep venous thrombosis on ultrasound                           | 2/ 13 (20.0)                  | 0                                    | 2/ 9 (22.2)                  |
| Pulmonary embolism on CTPA                                     | 6/ 25 (24.0)                  | 3/ 11 (27.3)                         | 3/ 14 (21.4)                 |
| <b>Received therapeutic anticoagulation</b>                    | 9/ 100 (9)                    | 2/ 68 (2.9)                          | 7/ 32<br>(21.9)              |
| Started for presumed hypercoagulable state due to COVID-19     | 3/ 100 (3)                    | 0                                    | 3/ 32 (9.4)                  |
| Started for confirmed venous thromboembolism                   | 5/ 100 (5)                    | 2/ 68 (2.9)                          | 3/ 32 (9.4)                  |
| Started for VV-ECMO circuit                                    | 1/ 100 (1)                    | 0                                    | 1/ 32 (3.1)                  |
| <b>Cardiac &amp; hemodynamic complications &amp; therapies</b> |                               |                                      |                              |
| Received vasopressors or inotropes - n (%)                     | NA                            | NA                                   | 24 (75.0)                    |
| Duration of vasopressors or inotropes - days, median (IQR)     | NA                            | NA                                   | 7.5 (2.3, 10.8)<br>n=26      |
| Steroids for hemodynamic shock - n (%)                         | 4 (4.0)                       | 0                                    | 4 (12.5)                     |
| <b>Echocardiogram findings - n/ N (%)</b>                      |                               |                                      |                              |
| Depressed LVEF (30-50%)                                        | 2/ 29 (6.9)                   | 0/ 5 (0)                             | 2/ 24 (8.3)                  |
| Severely depressed LVEF (< 30%)                                | 2/ 29 (6.9)                   | 1/ 5 (40)                            | 1/ 24 (4.2)                  |
| Reduced RV systolic function                                   | 5/ 29 (14.8)                  | 1/ 5 (20)                            | 3/ 24 (12.5)                 |
| Pulmonary hypertension                                         | 9/ 29 (31.0)                  | 2/ 5 (40)                            | 7/ 24 (29.2)                 |
| Pericardial effusion                                           | 1/ 29 (3.4)                   | 0/ 5 (0)                             | 1/ 24 (4.2)                  |
| <b>Renal complications &amp; therapies</b>                     |                               |                                      |                              |
| Acute kidney injury - n (%)                                    | 27 (27)                       | 11 (16.1)                            | 16 (50)                      |
| Received CRRT - n (%)                                          | NA                            | NA                                   | 5 (15.6)                     |
| Duration of CRRT - mean (SD)                                   | NA                            | NA                                   | 4.2 (2.59)                   |
| <b>Highest AKIN stage - n (%)</b>                              |                               |                                      |                              |
| Stage I                                                        | 16 (16)                       | 9 (13.2)                             | 7 (21.9)                     |
| Stage II                                                       | 5 (5)                         | 0                                    | 5 (15.6)                     |
| Stage III                                                      | 6 (6)                         | 2 (2.9)                              | 4 (12.5)                     |
| <b>Secondary infections - n (%)</b>                            |                               |                                      |                              |
| Positive respiratory culture                                   | 13 (13.0)                     | 0                                    | 13 (40.6)                    |
| Positive blood culture                                         | 8 (8.0)                       | 2 (2.9)                              | 6 (18.75)                    |
| Positive urine culture                                         | 15 (15.0)                     | 4 (5.9)                              | 11 (34.4)                    |
| Clostridium difficile                                          | 1 (1.0)                       | 1 (1.5)                              | 0                            |

ICU: intensive care unit; IQR: interquartile range; SD: standard deviation; CTPA: computerized tomography pulmonary angiography; VV-ECMO: veno-venous extracorporeal membrane oxygenation; LVEF: left ventricular ejection fraction; RV: right ventricle; CRRT: continuous renal replacement therapy; AKIN: Acute Kidney Injury Network.

**Table 5.** Outcomes of hospitalized patients with COVID-19.

| <b>Outcome</b>                                                    | <b>All patients<br/>N = 100</b> | <b>Non-ICU patients<br/>N = 68</b> | <b>ICU patients<br/>N = 32</b> |
|-------------------------------------------------------------------|---------------------------------|------------------------------------|--------------------------------|
| <b>Vital status - n (%)</b>                                       |                                 |                                    |                                |
| 28-day mortality                                                  | 28 (28.0)                       | 15 (22.1)                          | 13 (40.6)                      |
| Hospital mortality                                                | 34 (34.0)                       | 20 (29.4)                          | 14 (43.8)                      |
| <b>Disposition among survivors - n/ N (%)</b>                     |                                 |                                    |                                |
| Another acute care facility                                       | 2/ 66 (3.0)                     | 0                                  | 2/ 18 (11.1)                   |
| Rehabilitation centre                                             | 12/ 66 (18.2)                   | 8/ 48 (16.7)                       | 4/ 18 (22.2)                   |
| Home                                                              | 47/ 66 (71.1)                   | 35/ 48 (72.9)                      | 12/ 18 (66.7)                  |
| Long-term care facility                                           | 5/ 66 (7.6)                     | 5/ 48 (10.4)                       | 0                              |
| <b>CT thorax findings after hospital discharge - n/ N (%)</b>     |                                 |                                    |                                |
| Ground glass opacities                                            | 5/ 19 (26.3)                    | 3/ 11 (27.3)                       | 2/ 8 (25.0)                    |
| Emphysematous or bronchiectatic                                   | 6/ 19 (31.6)                    | 2/ 11 (18.2)                       | 4/ 8 (50.0)                    |
| Scarring or fibrosis                                              | 5/ 19 (26.3)                    | 0/ 11 (0)                          | 5/ 8 (62.5)                    |
| <b>Echocardiogram finding after hospital discharge - n/ N (%)</b> |                                 |                                    |                                |
| Depressed LVEF (30-50%)                                           | 1/ 15 (6.7)                     | 1/ 10 (10.0)                       | 0/ 5 (0)                       |
| Reduced RV systolic function                                      | 2/ 15 (13.3)                    | 2/ 10 (20.0)                       | 0/ 5 (0)                       |
| Right ventricular dilatation                                      | 5/ 15 (33.3)                    | 3/ 10 (30.0)                       | 2/ 5 (40.0)                    |

ICU: intensive care unit; CT: computerized tomography; LVEF: left ventricular ejection fraction; RV: right ventricle.

STROBE Statement—Checklist of items that should be included in reports of *cohort studies*

|                              | Item No | Recommendation                                                                                                                                                                                                                                                                                                         | Page No                                     |
|------------------------------|---------|------------------------------------------------------------------------------------------------------------------------------------------------------------------------------------------------------------------------------------------------------------------------------------------------------------------------|---------------------------------------------|
| <b>Title and abstract</b>    | 1       | (a) Indicate the study's design with a commonly used term in the title or the abstract<br>(b) Provide in the abstract an informative and balanced summary of what was done and what was found                                                                                                                          | 1, 2<br>2, 3                                |
| <b>Introduction</b>          |         |                                                                                                                                                                                                                                                                                                                        |                                             |
| Background/rationale         | 2       | Explain the scientific background and rationale for the investigation being reported                                                                                                                                                                                                                                   | 4                                           |
| Objectives                   | 3       | State specific objectives, including any prespecified hypotheses                                                                                                                                                                                                                                                       | 4                                           |
| <b>Methods</b>               |         |                                                                                                                                                                                                                                                                                                                        |                                             |
| Study design                 | 4       | Present key elements of study design early in the paper                                                                                                                                                                                                                                                                | 4, 5                                        |
| Setting                      | 5       | Describe the setting, locations, and relevant dates, including periods of recruitment, exposure, follow-up, and data collection                                                                                                                                                                                        | 4, 5                                        |
| Participants                 | 6       | (a) Give the eligibility criteria, and the sources and methods of selection of participants. Describe methods of follow-up<br>(b) For matched studies, give matching criteria and number of exposed and unexposed                                                                                                      | 5                                           |
| Variables                    | 7       | Clearly define all outcomes, exposures, predictors, potential confounders, and effect modifiers. Give diagnostic criteria, if applicable                                                                                                                                                                               | 5                                           |
| Data sources/<br>measurement | 8*      | For each variable of interest, give sources of data and details of methods of assessment (measurement). Describe comparability of assessment methods if there is more than one group                                                                                                                                   | 5,<br>Supplementary<br>Online<br>Material 1 |
| Bias                         | 9       | Describe any efforts to address potential sources of bias                                                                                                                                                                                                                                                              | NR                                          |
| Study size                   | 10      | Explain how the study size was arrived at                                                                                                                                                                                                                                                                              | NR                                          |
| Quantitative<br>variables    | 11      | Explain how quantitative variables were handled in the analyses. If applicable, describe which groupings were chosen and why                                                                                                                                                                                           | 6                                           |
| Statistical methods          | 12      | (a) Describe all statistical methods, including those used to control for confounding<br>(b) Describe any methods used to examine subgroups and interactions<br>(c) Explain how missing data were addressed<br>(d) If applicable, explain how loss to follow-up was addressed<br>(e) Describe any sensitivity analyses | 6                                           |
| <b>Results</b>               |         |                                                                                                                                                                                                                                                                                                                        |                                             |
| Participants                 | 13*     | (a) Report numbers of individuals at each stage of study—eg numbers potentially eligible, examined for eligibility, confirmed eligible, included in the study, completing follow-up, and analysed<br>(b) Give reasons for non-participation at each stage<br>(c) Consider use of a flow diagram                        | 7                                           |
| Descriptive data             | 14*     | (a) Give characteristics of study participants (eg demographic, clinical, social) and information on exposures and potential confounders<br>(b) Indicate number of participants with missing data for each variable of interest<br>(c) Summarise follow-up time (eg, average and total amount)                         | 7, Tables 1<br>& 2                          |
| Outcome data                 | 15*     | Report numbers of outcome events or summary measures over time                                                                                                                                                                                                                                                         | 11, 12,<br>Table 5                          |

|    |                          |    |                                                                                                                                                                                                              |                    |
|----|--------------------------|----|--------------------------------------------------------------------------------------------------------------------------------------------------------------------------------------------------------------|--------------------|
| 1  | Main results             | 16 | (a) Give unadjusted estimates and, if applicable, confounder-adjusted estimates and their precision (eg, 95% confidence interval). Make clear which confounders were adjusted for and why they were included | 8-11, Tables 3 & 4 |
| 2  |                          |    | (b) Report category boundaries when continuous variables were categorized                                                                                                                                    |                    |
| 3  |                          |    | (c) If relevant, consider translating estimates of relative risk into absolute risk for a meaningful time period                                                                                             |                    |
| 4  | Other analyses           | 17 | Report other analyses done—eg analyses of subgroups and interactions, and sensitivity analyses                                                                                                               | 12                 |
| 5  | <b>Discussion</b>        |    |                                                                                                                                                                                                              |                    |
| 6  | Key results              | 18 | Summarise key results with reference to study objectives                                                                                                                                                     | 12-14              |
| 7  | Limitations              | 19 | Discuss limitations of the study, taking into account sources of potential bias or imprecision. Discuss both direction and magnitude of any potential bias                                                   | 15                 |
| 8  | Interpretation           | 20 | Give a cautious overall interpretation of results considering objectives, limitations, multiplicity of analyses, results from similar studies, and other relevant evidence                                   | 15, 16             |
| 9  | Generalisability         | 21 | Discuss the generalisability (external validity) of the study results                                                                                                                                        | 15                 |
| 10 | <b>Other information</b> |    |                                                                                                                                                                                                              |                    |
| 11 | Funding                  | 22 | Give the source of funding and the role of the funders for the present study and, if applicable, for the original study on which the present article is based                                                | 17                 |

\*Give information separately for exposed and unexposed groups.

**Note:** An Explanation and Elaboration article discusses each checklist item and gives methodological background and published examples of transparent reporting. The STROBE checklist is best used in conjunction with this article (freely available on the Web sites of PLoS Medicine at <http://www.plosmedicine.org/>, Annals of Internal Medicine at <http://www.annals.org/>, and Epidemiology at <http://www.epidem.com/>). Information on the STROBE Initiative is available at <http://www.strobe-statement.org>.
